# Supplementary material for: Performance of ferrite nanoparticles in inductive heating swing adsorption (IHSA): how tailoring material properties can circumvent the design limitations of a system
Source: Royal Society of Chemistry journal article supplement (doi:10.1039/d4mh00377b), 2024-01-01
Supplement: d4mh00377b1.pdf [file d4mh00377b1.pdf]

## Methods, supplementary figures and tables

### **Performance of ferrite nanoparticles in inductive heating swing adsorption (IHSA): how tailoring material properties can circumvent the design limitations of a system.**

Maxim De Belder<sup>a,c,†</sup>, Alysson F. Morais<sup>a,d,†</sup>, Natan De Vos<sup>a</sup>, Luc Van Meervelt<sup>b</sup>, Joeri F.M. Denayer<sup>c</sup>, Johan A. Martens<sup>a,d</sup> and Eric Breynaert<sup>a,d,\*</sup>

<sup>a</sup>Center for Surface Chemistry and Catalysis - Characterization and Application Team (COK-KAT), KU Leuven, 3001 Leuven, Belgium.

<sup>b</sup>Department of Chemistry, KU Leuven, 3001 Leuven, Belgium.

<sup>c</sup>Department of Chemical Engineering, Vrije Universiteit Brussel, 1050 Brussels, Belgium.

<sup>d</sup>NMRCoRe – NMR - X-Ray platform for Convergence Research, KU Leuven, 3001 Leuven, Belgium.

† These authors contributed equally to this work

\* Corresponding author: eric.breynaert@kuleuven.be

## Contents

|                                                                 |          |
|-----------------------------------------------------------------|----------|
| <b>SI-1 Clarification on inductive heating mechanisms .....</b> | <b>1</b> |
| <b>SI-2 Materials and Methods.....</b>                          | <b>1</b> |
| <b>SI-3 Modelling .....</b>                                     | <b>2</b> |
| <b>SI-4 X-ray diffraction .....</b>                             | <b>3</b> |
| <b>SI-5 Additional magnetization information .....</b>          | <b>4</b> |
| <b>SI-6 SAR values .....</b>                                    | <b>4</b> |
| <b>SI-7 Density .....</b>                                       | <b>5</b> |
| <b>SI-8 Thermogravimetric data .....</b>                        | <b>5</b> |
| <b>References.....</b>                                          | <b>5</b> |

### **SI-1 Clarification on inductive heating mechanisms**

Joule heating results from the generation of 'Eddy currents' in macroscopic conductors. Typically, this mechanism prevails in the heating of metallic species. This has been implemented on a large scale, in kitchen appliances around the globe, and in a multitude of industrial applications. In the context of gas separation, however, long-term stability is a legitimate concern. Hence, these species are disregarded due to their inadequate oxidative and chemical stability.

The other three mechanisms of inductive heating occur in ferro- and ferrimagnetic species. When magnetic nanoparticles are dispersed as a ferrofluid, they are capable of dissipating heat via Brownian- and Néel relaxation. The former involves the physical rotation of the particles in the fluid, generating heat via friction. The latter implies a reorientation of the magnetization inside the particle against the energy barrier associated with the easy axis of magnetization. However, these mechanisms will not be present in the heating of a solid phase, such as a sorbent. The third mechanism, present in solid-state ferro- and ferri-magnetic particles, is hysteresis loss. In this last mechanism, heat is generated via the realignment of magnetic domains along the direction of the externally applied field.

### **SI-2 Materials and Methods**

Adapted procedure from Maaz et al. and Surendra et al..<sup>1,2</sup> All chemicals and reagents were of analytical grade and used without further purification. The precursor solutions were made of 1 mol L<sup>-1</sup> of the metal nitrates in the stoichiometric ratio corresponding with the final composition of the ferrite. For cobalt ferrite (CoFe<sub>2</sub>O<sub>4</sub>), the precursor consisted of Iron (III) nitrate nonahydrate (Fe(NO<sub>3</sub>)<sub>3</sub> • 9 H<sub>2</sub>O, Fisher) and Cobalt (II) nitrate hexahydrate (Co(NO<sub>3</sub>)<sub>2</sub> • 6 H<sub>2</sub>O, AlfaAesar). For nickel ferrite (NiFe<sub>2</sub>O<sub>4</sub>), the precursor consisted of Iron (III) nitrate nonahydrate and Nickel (II) nitrate hexahydrate (Ni(NO<sub>3</sub>)<sub>2</sub> • 6 H<sub>2</sub>O, Fisher). For cobalt-substituted nickel ferrites

(Ni<sub>x</sub>Co<sub>1-x</sub>Fe<sub>2</sub>O<sub>4</sub>), the precursor solution consisted also of Iron (III) nitrate nonahydrate (Fe(NO<sub>3</sub>)<sub>3</sub> • 9 H<sub>2</sub>O, Fisher), and a mixture of Cobalt (II) nitrate hexahydrate (Co(NO<sub>3</sub>)<sub>2</sub> • 6 H<sub>2</sub>O, AlfaAesar) and Nickel (II) nitrate hexahydrate (Ni(NO<sub>3</sub>)<sub>2</sub> • 6 H<sub>2</sub>O, Fisher).

Co-precipitation was carried out by dropwise addition of the precursor solution to 200 mL of Milli-Q H<sub>2</sub>O. 100 µL of oleic acid (Acros) was added to mitigate aggregation in the precipitation stage. The addition is done via a perfusion pump and a 25 mL syringe at a rate of 10 mL/h. The pH is kept constant throughout the precipitation stage via the addition of 1 M NaOH.

Upon completion, the precipitate is consecutively aged at 80°C for 1h in dynamic conditions. After cooling to room temperature, the precipitate is washed twice with Milli-Q H<sub>2</sub>O and once with absolute ethanol. The wet precipitate was dried at 60°C for 24h in the oven. Finally, the precipitate is ground and subsequently calcined at a temperature of 600 °C during 6h.

All samples were structurally analysed using powder X-ray diffraction with Mo Kα radiation (Agilent Supernova diffractometer). The size and morphology of the particles were characterized on a transmission electron microscope (ARM200F by JEOL) operating at 200 kV. Elemental composition is evaluated using ICP-OES (Varian 720-ES) with cooled cone interface and oxygen-free optics. The corresponding lines for Co, Fe, and Ni were 228.615, 238.204, and 231.604 respectively. The magnetic characterization of the resulting particles was performed on a VSM-SQUID (MPMS-3 by Quantum Design) by measuring the hysteresis loops at 300 K and with a maximum field of ±70 kOe.

**Table S1:** Nomenclature and bulk composition of the produced samples, as derived from ICP-OES data.

| Name   | Nominal        |                |                                                                      | Experimental |        |        |                                                                      |
|--------|----------------|----------------|----------------------------------------------------------------------|--------------|--------|--------|----------------------------------------------------------------------|
|        | 100*Ni/(Ni+Co) | 100*Co/(Ni+Co) | Formula                                                              | Co wt%       | Fe wt% | Ni wt% | Formula                                                              |
| CF     | 0              | 100            | CoFe <sub>2</sub> O <sub>4</sub>                                     | 4.687        | 3.689  | 0.015  | CoFe <sub>2</sub> O <sub>4</sub>                                     |
| NCF 80 | 80             | 20             | Ni <sub>0.80</sub> Co <sub>0.20</sub> Fe <sub>2</sub> O <sub>4</sub> | 2.821        | 14.919 | 11.056 | Ni <sub>0.80</sub> Co <sub>0.20</sub> Fe <sub>2</sub> O <sub>4</sub> |
| NCF 90 | 90             | 10             | Ni <sub>0.90</sub> Co <sub>0.10</sub> Fe <sub>2</sub> O <sub>4</sub> | 1.025        | 13.082 | 8.884  | Ni <sub>0.90</sub> Co <sub>0.10</sub> Fe <sub>2</sub> O <sub>4</sub> |
| NCF 95 | 95             | 5              | Ni <sub>0.95</sub> Co <sub>0.05</sub> Fe <sub>2</sub> O <sub>4</sub> | 0.397        | 8.901  | 7.191  | Ni <sub>0.95</sub> Co <sub>0.05</sub> Fe <sub>2</sub> O <sub>4</sub> |
| NF     | 100            | 0              | NiFe <sub>2</sub> O <sub>4</sub>                                     | 0.006        | 5.069  | 4.034  | NiFe <sub>2</sub> O <sub>4</sub>                                     |

To determine the inductive heating performance, the particles were submerged in 8.68 mL of milli-Q H<sub>2</sub>O in a 10 mL glass vial. Testing was conducted on an Ambrell 8310 with a coil with a length of 7 cm, 8 turns, and an outer diameter of 3.8 cm. The field was operated at a frequency of 248 kHz and at different amplitudes (99, 136, 158, 200, 226, and 257 Oe). The specific absorption rate (SAR) in W/g was calculated based on the initial temperature change using equations SI-1-3, with (mC<sub>p</sub>)<sub>tot</sub> of 50 J/K:

$$\left. \frac{dT}{dt} \right|_{t=0} = \frac{Q}{(mC_p)_{tot}} \quad (\text{SI-1})$$

$$(mC_p)_{tot} = (mC_p)_{water} + (mC_p)_{vial} + (mC_p)_{FNP} \quad (\text{SI-2})$$

$$SAR = \frac{Q}{m_{FNP}} \quad (\text{SI-3})$$

### SI-3 Modelling

Integrating the area between the hysteresis described by Eq. 3 in the main text, the amount of heat that can be generated through hysteresis losses is:

$$\frac{SAR \cdot \rho}{\mu_0 V M_S f} = \frac{2}{\alpha} \ln \left[ \frac{\cosh \alpha (h_{max} + H_C)}{\cosh \alpha (h_{max} - H_C)} \right] - 2h_{max} \{ \tanh[\alpha (h_{max} + H_C)] - \tanh[\alpha (h_{max} - H_C)] \} \quad (\text{SI-4})$$

where  $\rho$  is the density of the material and  $f$  is the frequency of the oscillating magnetic field.

To analyse equation SI-4 for a system where  $h_{max}$  is fixed, we define the variables:

$$A = \alpha h_{max}$$

$$\eta = H_c/h_{max}$$

And Eq SI-4 can be rewritten as:

$$\frac{SAR \cdot \rho}{4 \mu_0 M_S h_{max} f} = \frac{1}{2A} \ln \left[ \frac{\cosh A(1 + \eta)}{\cosh A(1 - \eta)} \right] - \frac{1}{2} \{ \tanh[A(1 + \eta)] - \tanh[A(1 - \eta)] \} \quad (SI-5)$$

To analyse equation SI-4 for a system where  $H_c$  and  $\alpha$  are fixed, we define the variables:

$$\beta = \alpha H_c$$

$$\gamma = h_{max}/H_c$$

And Eq SI-4 can be rewritten as:

$$\frac{SAR \cdot \rho}{4 \mu_0 M_S H_c f} = \frac{1}{2\beta} \ln \left[ \frac{\cos \beta(\gamma + 1)}{\cos \beta(\gamma - 1)} \right] - \frac{\gamma}{2} \{ \tan \beta(\gamma + 1) - \tan \beta(\gamma - 1) \} \quad (SI-6)$$

### SI-4 X-ray diffraction

The PXRD patterns of the ferrite samples shown on **Figure S1** confirm the formation of the spinel ferrite phases, as evidenced by the presence of the characteristic peaks. Le Bail fitting confirmed the characteristic cubic unit cell of a spinel ferrite, with lattice parameters  $a = b = c = 8.318 \text{ \AA}$

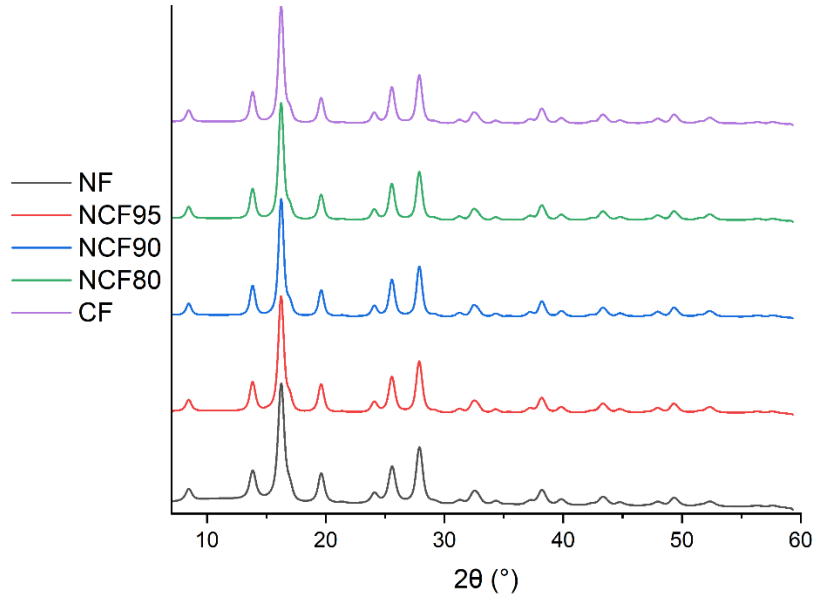

**Figure S1:** X-ray diffractograms of the samples (measured with Mo K $\alpha$  radiation)

## SI-5 Additional magnetization information

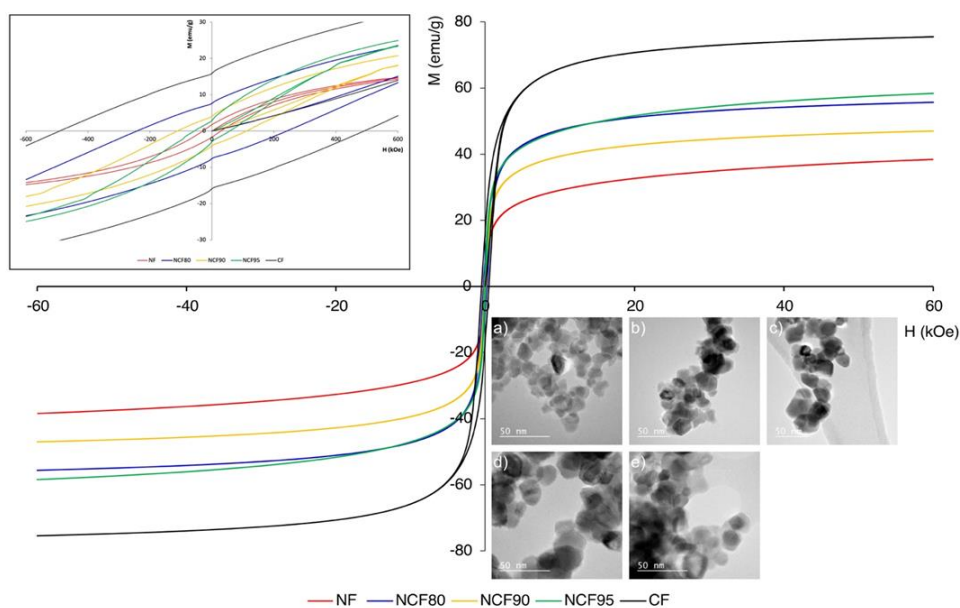

**Figure S2:** Full magnetization curve of the samples, Zoomed-in section of magnetization curve at low field strengths, and TEM images of samples. a) CF, b) NCF80, c) NCF90, d) NCF95, and e) NF

## SI-6 SAR values

**Table S2:** SAR values for different ferrite nanoparticles measured at varying field strengths alternated at 248 kHz.

| Name   | %Ni | %Co | $M_s$<br>(emu/g) | $H_c$ (Oe) | $\alpha$ (1/kOe) | SAR (W/g)               |       |       |       |       |       |
|--------|-----|-----|------------------|------------|------------------|-------------------------|-------|-------|-------|-------|-------|
|        |     |     |                  |            |                  | field strengths (in Oe) |       |       |       |       |       |
|        |     |     |                  |            |                  | 99.0                    | 135.7 | 158.3 | 200.7 | 226.2 | 257.3 |
| CF     | 0   | 100 | 75.47            | 490.69     | 0.5              | 0.5                     | 1.6   | 1.7   | 3.6   | 5.8   | 8.2   |
| NCF 80 | 80  | 20  | 55.63            | 241.37     | 0.65             | 0.3                     | 0.9   | 1.0   | 2.4   | 4.0   | 5.5   |
| NCF 90 | 90  | 10  | 47.00            | 111.12     | 0.86             | 0.4                     | 1.1   | 1.5   | 4.8   | 8.3   | 12.3  |
| NCF 95 | 95  | 5   | 58.43            | 56.67      | 0.99             | 0.7                     | 2.2   | 3.5   | 8.4   | 13.6  | 21.4  |
| NF     | 100 | 0   | 38.44            | 29.18      | 1.26             | 4.6                     | 10.6  | 15.6  | 25.9  | 30.2  | 43.8  |

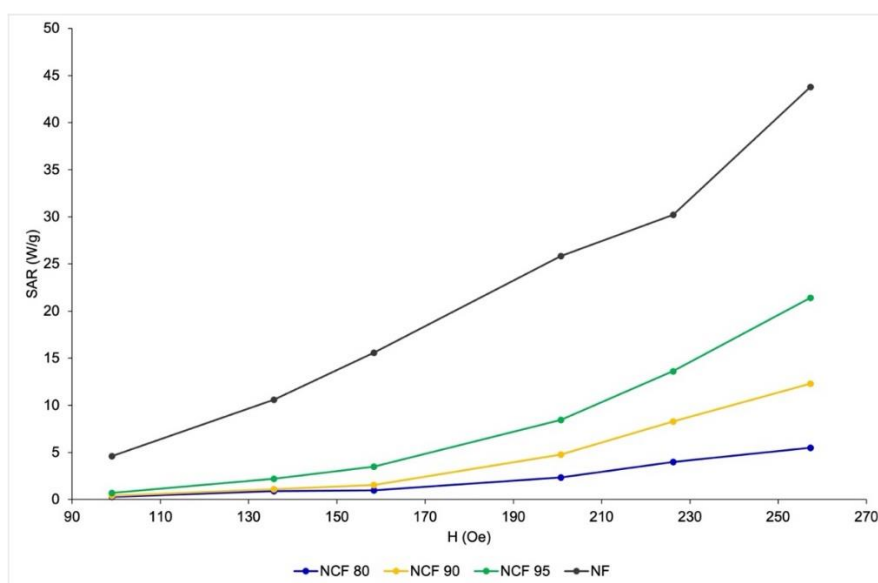

**Figure S3:** SAR as a function of external field strength.

**Table S3:** A comparison of different works in literature employing ferrite susceptors for inductive heating.

| Author                | Susceptor                                                          | Material            | $M_s$<br>(emu/g) | $H_c$<br>(Oe) | Particle size<br>(nm) | $h_{max}$<br>(Oe) | f<br>(kHz) | SAR<br>(W/g) | SAR.f <sup>-1</sup> $\zeta$<br>(mJ/g) |
|-----------------------|--------------------------------------------------------------------|---------------------|------------------|---------------|-----------------------|-------------------|------------|--------------|---------------------------------------|
| Present work          | NiFe <sub>2</sub> O <sub>4</sub>                                   | Ni-ferrite          | 38.4             | 29.2          | 25                    | 257               | 248        | 43.8         | 177                                   |
| Bellusci <sup>1</sup> | Fe <sub>3</sub> O <sub>4</sub>                                     | MOF + 17% magnetite | 84.00            | 40            | 33.2                  | 126               | 190        | 9.4          | 49.5                                  |
| Newport <sup>2</sup>  | Fe <sub>2</sub> O <sub>3</sub>                                     | 13X + 20% hematite  | NA               | NA            | 5000                  | 324               | – #        | 53.2         | – #                                   |
| Sadiq <sup>3,*</sup>  | MgFe <sub>2</sub> O <sub>4</sub>                                   | Mg-ferrite*         | 67               | 105           | 13.6                  | 210               | – #        | 32.4         | – #                                   |
|                       |                                                                    |                     |                  |               |                       | 320               |            | 46.7         | – #                                   |
| Ghasemi <sup>4</sup>  | Cu <sub>0.2</sub> Cd <sub>0.8</sub> Fe <sub>2</sub> O <sub>4</sub> | Cu/Cd-ferrite       | 20               | 10            | 13.8                  | 384               | 340        | 0.7          | 2.06                                  |

\* In their work, Sadiq et al. employ a composite consisting of UiO-66 and MgFe<sub>2</sub>O<sub>4</sub> for the eventual IHSA application. In contrast to the other works, detailed information about the unincorporated susceptor particle is provided.  $\zeta$  Calculated by us to allow comparison between different references. Calculated using the information provided in the respective references. According to Eq. 1-2 from the main text, this quantity corresponds to the heat generated during one field cycling. # Frequency not specified by the authors.

## SI-7 Density

The density of each of the materials was estimated via the nominal chemical formula and the unit cell volume derived from their crystal structure. The results are listed in **Table S5**.

**Table S4:** Densities of the different ferrite species

| Sample                                    | NF                               | NCF80                                                                | NCF90                                                                | NCF95                                                                | CF                               |
|-------------------------------------------|----------------------------------|----------------------------------------------------------------------|----------------------------------------------------------------------|----------------------------------------------------------------------|----------------------------------|
| Formula                                   | NiFe <sub>2</sub> O <sub>4</sub> | Ni <sub>0.80</sub> Co <sub>0.20</sub> Fe <sub>2</sub> O <sub>4</sub> | Ni <sub>0.90</sub> Co <sub>0.10</sub> Fe <sub>2</sub> O <sub>4</sub> | Ni <sub>0.95</sub> Co <sub>0.05</sub> Fe <sub>2</sub> O <sub>4</sub> | CoFe <sub>2</sub> O <sub>4</sub> |
| Density <sup>#</sup> (g/cm <sup>3</sup> ) | 5.1854                           | 5.1864                                                               | 5.1859                                                               | 5.1857                                                               | 5.1907                           |

# Density evaluated via the unit cell volume and the mass of its contents.

## SI-8 Thermogravimetric data

The formation of a thermally stable nickel ferrite out of a hydroxide precursor is attested by a thermogravimetric analysis.

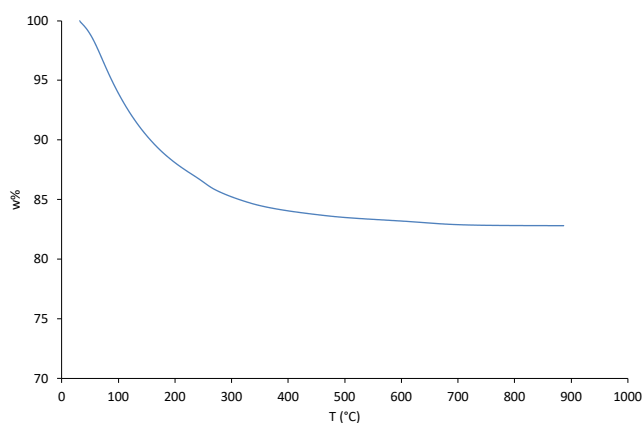**Figure S4:** The thermogravimetric curve of a Ni/Fe hydroxide used as a precursor for the fabrication of NiFe<sub>2</sub>O<sub>4</sub> ferrites.

## References

- 1 K. Maaz, S. Karim, A. Mumtaz, S. K. Hasanain, J. Liu and J. L. Duan, *J Magn Magn Mater*, 2009, **321**, 1838–1842.
- 2 M. K. Surendra, R. Dutta and M. S. Ramachandra Rao, *Mater Res Express*, , DOI:10.1088/2053-1591/1/2/026107.
- 3 M. Bellusci, M. Albino, A. Masi, D. Peddis, C. Innocenti and F. Varsano, *Mater Chem Phys*, 2024, **311**, 128525.
- 4 K. Newport, K. Baamran, A. A. Rowanghi and F. Rezaei, *Ind Eng Chem Res*, 2022, **61**, 18843–18853.
- 5 M. M. Sadiq, H. Li, A. J. Hill, P. Falcaro, M. R. Hill and K. Suzuki, *Chemistry of Materials*, 2016, **28**, 6219–6226.
- 6 R. Ghasemi, J. Echeverría, J. I. Pérez-Landazábal, J. J. Beato-Lopez, M. Naseri and C. Gómez-Polo, *J Magn Magn Mater*, 2020, **499**, 166201.
